# Supplementary material for: ENPL-1, theCaenorhabditis eleganshomolog of GRP94, promotes insulin secretion via regulation of proinsulin processing and maturation
Source: Oxford University Press journal article supplement (doi:10.1242/dev.190082), 2020-01-01
Supplement: dev190082supp.pdf [file dev190082supp.pdf]

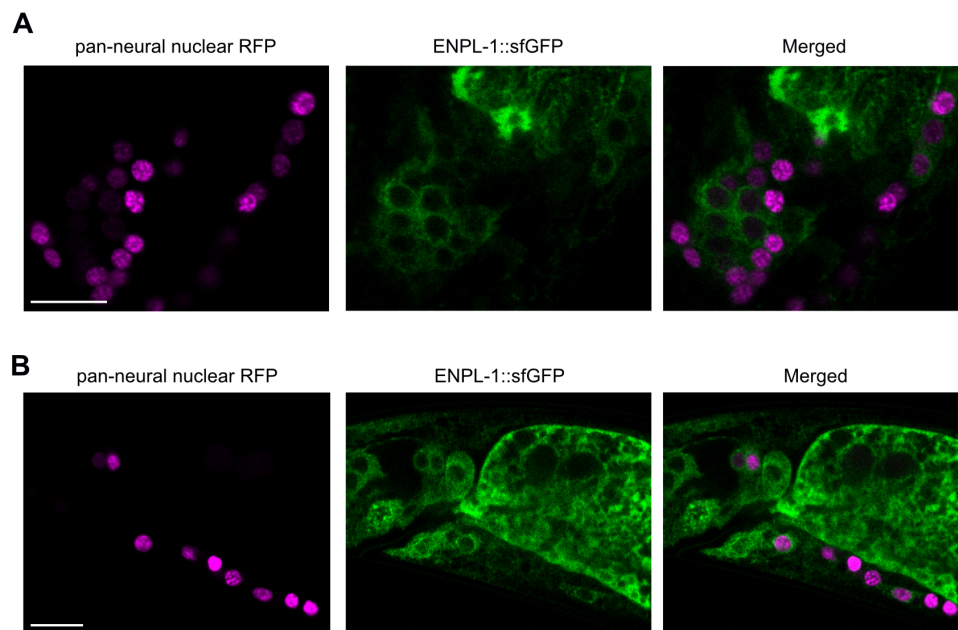

**Fig. S1.**

(A) Representative confocal images of adult animals co-expressing pan-neural nuclear RFP and ENPL-1::sfGFP in the lateral and ventral ganglia. Merged panel shows co-localization of both tagged proteins ( $n \geq 10$ ). Scale bar: 10  $\mu$ m. (B) Representative confocal image of adult animals co-expressing pan-neural nuclear RFP and ENPL-1::sfGFP in ventral nerve cord. Merged panel shows co-localization of both tagged proteins ( $n \geq 10$ ). Scale bar: 10  $\mu$ m.

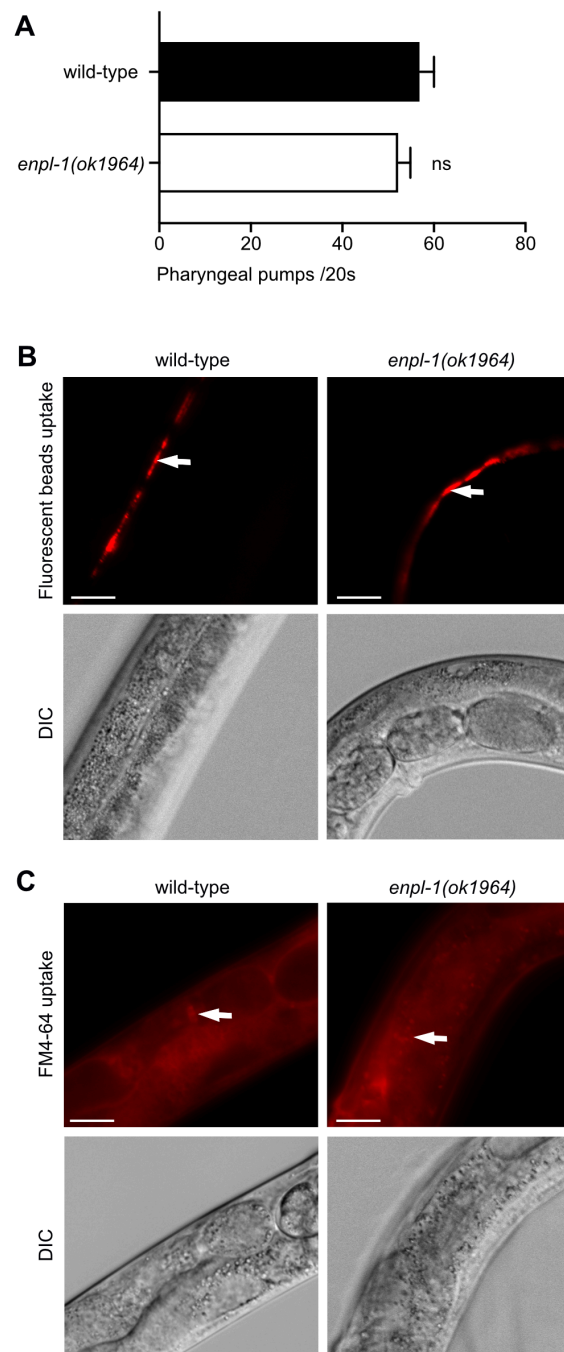

**Fig. S2.**

(A) Pharyngeal pumping rate in adult wild-type and *enpl-1(ok1964)* animals. Bars represent mean  $\pm$  SD ( $n \geq 50$ ). Statistical significance was determined by the two-tailed t-test. The experiment was performed in triplicate. (B) Fluorescence beads uptake of adult wild-type and *enpl-1(ok1964)* animals. White arrows indicate 0.2mm fluorescence beads in the intestinal lumen of treated animals ( $n=20$ ). Scale bar: 25 $\mu$ m. (C) FM4-64 endocytosis of adult wild-type and *enpl-1(ok1964)* animals. White arrows indicate the FM4-64 uptake by the vesicles in the intestinal cells of treated animals ( $n=20$ ). Scale bar: 25 $\mu$ m.

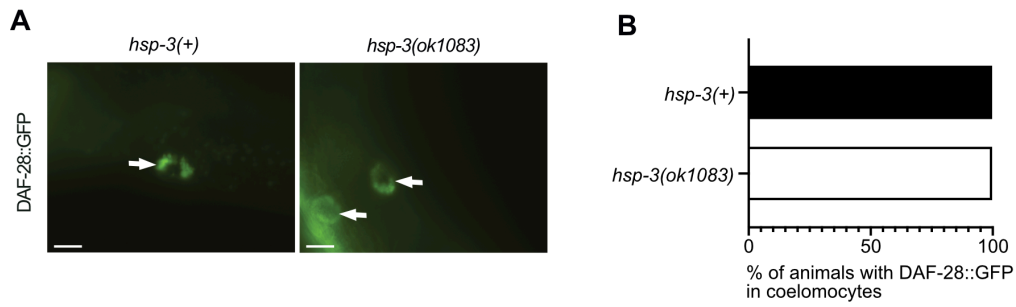

**Fig. S3.**

(A) Representative fluorescence images of adult *hsp-3(+)* animals and *hsp-3(ok1083)* mutants expressing DAF-28::GFP. White arrows indicate localization of DAF-28::GFP-positive coelomocytes ( $n \geq 15$ ). Scale bar: 10  $\mu$ m. (B) Bars represent percentage of animals in which DAF-28::GFP is localized to coelomocytes ( $n \geq 15$ ).

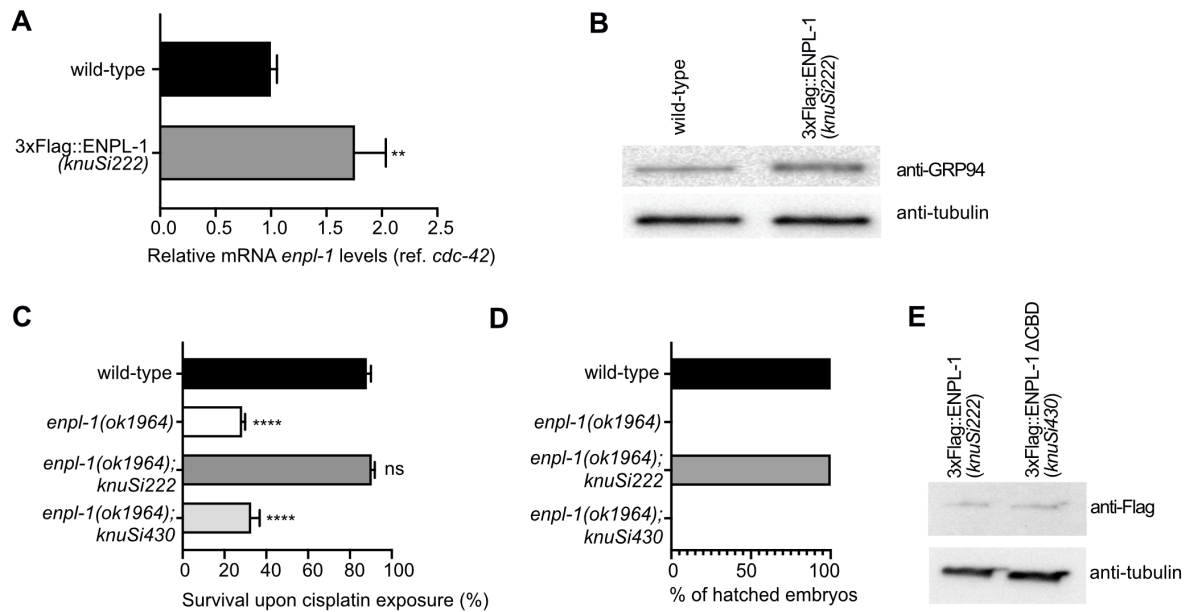**Fig. S4.**

(A) Relative qPCR analysis of *enpl-1* expression in wild-type and 3xFlag::ENPL-1(*knuSi222*) animals. Statistical significance was determined by the two-tailed t-test (\*\* $p < 0.01$ ). Bars represent mean  $\pm$  SD. *cdc42* was used as a normalizing control for the experiment. The experiment was performed in triplicate. (B) Western blot analysis of ENPL-1 in wild-type animals and 3xFlag::ENPL-1(*knuSi222*) expressing animals. Blots were probed with the anti-GRP94 antibody 9G10. Tubulin was used as a loading control. The experiment was performed in triplicate. (C) Quantification of survival of young adults after 24h exposure to 300 $\mu$ g/ml of cisplatin in wild-type animals, *enpl-1(ok1964)* mutants, *enpl-1(ok1964)* mutants carrying the *knuSi222* transgene (full-length ENPL-1) or *knuSi430* (CBD deleted ENPL-1). Statistical significance was determined by the two-tailed t-test (\*\*\*\* $p < 0.0001$ ). Bars represent mean  $\pm$  SD ( $n \geq 50$ ). The experiment was performed in triplicate. (D) Quantification of embryonic viability in wild-type animals, *enpl-1(ok1964)* mutants, *enpl-1(ok1964)* mutants carrying the *knuSi222* transgene (full-length ENPL-1) or *knuSi430* (CBD deleted ENPL-1). Bars represent percentage of hatched embryos ( $n \geq 50$ ). (E) Western blot analysis of ENPL-1 in 3xFlag::ENPL-1(*knuSi222*) and 3xFlag::ENPL-1<sup>ΔCBD</sup>(*knuSi430*) expressing animals. Blots were probed with the anti-Flag antibody. Tubulin was used as a loading control. The experiment was performed in triplicate.

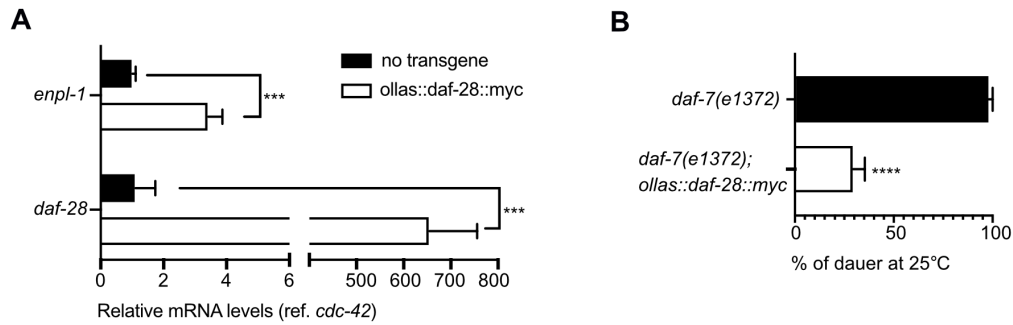**Fig. S5.**

(A) Relative qPCR analysis of *enpl-1* and *daf-28* genes in non-transgenic animals and *rawEx11* (*ollas::daf-28::myc*) bearing transgenic animals. Statistical significance was determined by the two-tailed t-test (\*\* $p < 0.001$ ). Bars represent mean  $\pm$  SD. *cdc42* was used as a normalizing control for the experiment. The experiment was performed in triplicate. (B) *daf-7(e1372)* mutants with and without the transgene expressing *ollas::daf-28::myc* were analyzed for exit from the dauer state at 25°C after 96 hours. The transgene promoted dauer exit of *daf-7* dauers raised at 25°C. Statistical significance was determined by the two-tailed t-test (\*\*\*\* $p < 0.0001$ ). Bars represent mean  $\pm$  SD ( $n \geq 150$ ). The experiment was performed in triplicate.
